# Supplementary material for: Effectiveness of BNT162b2 and mRNA-1273 Second Doses and Boosters for SARS-CoV-2 infection and SARS-CoV-2 Related Hospitalizations: A Statewide Report from the Minnesota Electronic Health Record Consortium
Source: bioRxiv or medRxiv preprint supplement (doi:10.1101/2021.12.23.21267853), 2022-01-10
Supplement: Supplementary file [file media-1.pdf]

Supplemental Table 1. Characteristics of individuals who received a second dose of a Pfizer or Moderna vaccine and those who received a booster dose (through November 27, 2021).

| Group                            | Received Second Dose |           | Booster Dose |         |
|----------------------------------|----------------------|-----------|--------------|---------|
|                                  | Pfizer               | Moderna   | Pfizer       | Moderna |
| Total                            | 1,732,112            | 1,066,645 | 609,153      | 395,634 |
| Age 0 to 18                      | 248,614              | 7,186     | 2,898        | 608     |
| Age 19 to 24                     | 108,668              | 69,760    | 11,621       | 8,198   |
| Age 25 to 44                     | 453,938              | 301,836   | 113,902      | 69,049  |
| Age 45 to 64                     | 501,756              | 362,835   | 179,092      | 124,029 |
| Age 65 to 74                     | 223,685              | 196,951   | 156,704      | 122,144 |
| Age 75 and up                    | 193,561              | 127,184   | 144,688      | 71,479  |
| Age missing                      | 1,890                | 893       | 248          | 127     |
| Female                           | 935,923              | 581,345   | 352,002      | 226,975 |
| Male                             | 796,189              | 485,300   | 257,151      | 168,659 |
| Asian/Pacific Islander           | 101,361              | 48,984    | 22,872       | 11,827  |
| Black                            | 97,753               | 52,980    | 12,550       | 7,749   |
| Hispanic                         | 72,944               | 37,904    | 10,476       | 5,938   |
| Multiracial                      | 19,630               | 8,912     | 3,688        | 2,387   |
| American Indian or Alaska Native | 9,494                | 11,407    | 2,036        | 3,756   |
| White                            | 1,364,534            | 859,030   | 540,456      | 349,267 |
| Other, Unknown, Missing          | 66,396               | 47,428    | 17,075       | 14,710  |
| Diabetes                         | 124,347              | 87,984    | 68,869       | 40,890  |
| Hypertension                     | 341,705              | 238,458   | 200,346      | 117,881 |
| Heart Disease                    | 109,689              | 81,479    | 70,803       | 41,715  |
| Cancer                           | 101,759              | 66,397    | 65,795       | 37,165  |
| COPD                             | 91,618               | 63,395    | 44,638       | 27,558  |

Supplemental Table 2. Vaccine effectiveness for SARS-CoV-2 infections by manufacturer and booster status

| Group                            | Manufacturer | Status       | Vaccinated |          | Unvaccinated |          | VE  | VE 95% CI LL | VE 95% CI UL |
|----------------------------------|--------------|--------------|------------|----------|--------------|----------|-----|--------------|--------------|
|                                  |              |              | Tested     | Positive | Tested       | Positive |     |              |              |
| All (age 19 and up)              | PFR          | Complete >26 | 81486      | 9823     | 209537       | 41956    | 45  | 44           | 47           |
| All (age 19 and up)              | PFR          | booster      | 38291      | 1141     | 209537       | 41956    | 88  | 87           | 88           |
| All (age 19 and up)              | MOD          | Complete >26 | 73934      | 5879     | 209537       | 41956    | 65  | 64           | 66           |
| All (age 19 and up)              | MOD          | booster      | 9582       | 206      | 209537       | 41956    | 91  | 90           | 92           |
| Female                           | PFR          | Complete >26 | 53162      | 5882     | 213099       | 33912    | 34  | 32           | 36           |
| Female                           | PFR          | booster      | 23832      | 566      | 213099       | 33912    | 87  | 86           | 88           |
| Female                           | MOD          | Complete >26 | 45770      | 3458     | 213099       | 33912    | 57  | 55           | 58           |
| Female                           | MOD          | booster      | 5640       | 102      | 213099       | 33912    | 90  | 88           | 92           |
| Male                             | PFR          | Complete >26 | 29647      | 4039     | 195677       | 33845    | 25  | 22           | 27           |
| Male                             | PFR          | booster      | 14631      | 581      | 195677       | 33845    | 80  | 78           | 82           |
| Male                             | MOD          | Complete >26 | 28335      | 2435     | 195677       | 33845    | 55  | 53           | 57           |
| Male                             | MOD          | booster      | 3944       | 104      | 195677       | 33845    | 87  | 84           | 89           |
| Age 65 and up                    | PFR          | Complete >26 | 30027      | 3663     | 33585        | 5488     | 29  | 26           | 32           |
| Age 65 and up                    | PFR          | booster      | 19330      | 562      | 33585        | 5488     | 85  | 83           | 86           |
| Age 65 and up                    | MOD          | Complete >26 | 37306      | 2473     | 33585        | 5488     | 64  | 62           | 65           |
| Age 65 and up                    | MOD          | booster      | 5837       | 120      | 33585        | 5488     | 89  | 87           | 91           |
| Age 45 to 64                     | PFR          | Complete >26 | 23898      | 2997     | 56798        | 11993    | 46  | 44           | 49           |
| Age 45 to 64                     | PFR          | booster      | 9919       | 346      | 56798        | 11993    | 86  | 85           | 88           |
| Age 45 to 64                     | MOD          | Complete >26 | 19785      | 1809     | 56798        | 11993    | 62  | 60           | 64           |
| Age 45 to 64                     | MOD          | booster      | 2470       | 64       | 56798        | 11993    | 90  | 87           | 92           |
| Age 19 to 44                     | PFR          | Complete >26 | 27553      | 3163     | 116206       | 23603    | 49  | 47           | 51           |
| Age 19 to 44                     | PFR          | booster      | 9036       | 233      | 116206       | 23603    | 90  | 88           | 91           |
| Age 19 to 44                     | MOD          | Complete >26 | 16841      | 1597     | 116206       | 23603    | 59  | 57           | 61           |
| Age 19 to 44                     | MOD          | booster      | 1272       | 22       | 116206       | 23603    | 93  | 89           | 95           |
| American Indian/Alaska Native MN | PFR          | Complete >26 | 346        | 47       | 5110         | 989      | 35  | 10           | 52           |
| American Indian/Alaska Native MN | PFR          | booster      | 149        | <11      | 5110         | 989      | 85  | 65           | 95           |
| American Indian/Alaska Native MN | MOD          | Complete >26 | 934        | 85       | 5110         | 989      | 58  | 47           | 67           |
| American Indian/Alaska Native MN | MOD          | booster      | 95         | <11      | 5110         | 989      | 85  | 55           | 95           |
| Asian/PI MN                      | PFR          | Complete >26 | 2502       | 257      | 12328        | 1383     | 9   | -4           | 21           |
| Asian/PI MN                      | PFR          | booster      | 1036       | 19       | 12328        | 1383     | 85  | 77           | 91           |
| Asian/PI MN                      | MOD          | Complete >26 | 1550       | 112      | 12328        | 1383     | 38  | 25           | 50           |
| Asian/PI MN                      | MOD          | booster      | 165        | <11      | 12328        | 1383     | 100 |              | 100          |
| Black MN                         | PFR          | Complete >26 | 2569       | 239      | 44373        | 5859     | 33  | 23           | 41           |
| Black MN                         | PFR          | booster      | 675        | 11       | 44373        | 5859     | 89  | 80           | 94           |
| Black MN                         | MOD          | Complete >26 | 3021       | 142      | 44373        | 5859     | 68  | 62           | 73           |
| Black MN                         | MOD          | booster      | 167        | <11      | 44373        | 5859     | 80  | 50           | 90           |
| Hispanic MN                      | PFR          | Complete >26 | 1929       | 222      | 26643        | 4186     | 30  | 19           | 40           |
| Hispanic MN                      | PFR          | booster      | 600        | 18       | 26643        | 4186     | 83  | 73           | 90           |
| Hispanic MN                      | MOD          | Complete >26 | 1478       | 124      | 26643        | 4186     | 51  | 41           | 59           |
| Hispanic MN                      | MOD          | booster      | 178        | <11      | 26643        | 4186     | 90  | 65           | 95           |
| White MN                         | PFR          | Complete >26 | 73090      | 8927     | 275652       | 50170    | 37  | 36           | 39           |
| White MN                         | PFR          | booster      | 35060      | 955      | 275652       | 50170    | 87  | 87           | 88           |
| White MN                         | MOD          | Complete >26 | 64217      | 5264     | 275652       | 50170    | 60  | 59           | 61           |
| White MN                         | MOD          | booster      | 8691       | 188      | 275652       | 50170    | 90  | 89           | 91           |
| Diabetes                         | PFR          | Complete >26 | 10209      | 1398     | 16622        | 3112     | 31  | 26           | 36           |
| Diabetes                         | PFR          | booster      | 5850       | 367      | 16622        | 3112     | 71  | 67           | 74           |
| Diabetes                         | MOD          | Complete >26 | 11522      | 858      | 16622        | 3112     | 65  | 62           | 68           |
| Diabetes                         | MOD          | booster      | 1805       | 41       | 16622        | 3112     | 90  | 86           | 93           |
| Hypertension                     | PFR          | Complete >26 | 26113      | 3412     | 38510        | 7051     | 33  | 30           | 36           |
| Hypertension                     | PFR          | booster      | 15478      | 607      | 38510        | 7051     | 82  | 80           | 83           |
| Hypertension                     | MOD          | Complete >26 | 27224      | 2087     | 38510        | 7051     | 63  | 61           | 65           |
| Hypertension                     | MOD          | booster      | 4475       | 114      | 38510        | 7051     | 88  | 86           | 90           |
| Heart Disease                    | PFR          | Complete >26 | 12990      | 1418     | 15363        | 2093     | 22  | 17           | 28           |
| Heart Disease                    | PFR          | booster      | 8065       | 203      | 15363        | 2093     | 84  | 81           | 86           |
| Heart Disease                    | MOD          | Complete >26 | 16070      | 984      | 15363        | 2093     | 59  | 55           | 62           |
| Heart Disease                    | MOD          | booster      | 2434       | 55       | 15363        | 2093     | 85  | 81           | 89           |
| Cancer                           | PFR          | Complete >26 | 7870       | 842      | 10088        | 1348     | 22  | 15           | 29           |
| Cancer                           | PFR          | booster      | 6520       | 239      | 10088        | 1348     | 75  | 72           | 79           |
| Cancer                           | MOD          | Complete >26 | 7484       | 498      | 10088        | 1348     | 54  | 49           | 58           |
| Cancer                           | MOD          | booster      | 2153       | 62       | 10088        | 1348     | 81  | 75           | 85           |
| COPD                             | PFR          | Complete >26 | 7664       | 883      | 20530        | 3537     | 37  | 32           | 42           |
| COPD                             | PFR          | booster      | 4279       | 119      | 20530        | 3537     | 86  | 83           | 89           |
| COPD                             | MOD          | Complete >26 | 8633       | 569      | 20530        | 3537     | 66  | 63           | 69           |
| COPD                             | MOD          | booster      | 1437       | 41       | 20530        | 3537     | 86  | 81           | 90           |

Note: MOD, Moderna; PFR, Pfizer; VE, vaccine effectiveness. Complete >26 indicates individuals more than 26 weeks since a second dose. Booster indicates individuals at least two weeks after a booster dose of Pfizer or Moderna.

Supplemental Table 3. Vaccine effectiveness for SARS-CoV-2 related hospitalizations by manufacturer and booster status

| Group                            | Manufacturer | Status       | Vaccinated           |                  | Unvaccinated         |                  | VE  | VE 95% CI LL | VE 95% CI UL |
|----------------------------------|--------------|--------------|----------------------|------------------|----------------------|------------------|-----|--------------|--------------|
|                                  |              |              | Person weeks at risk | Hospitalizations | Person weeks at risk | Hospitalizations |     |              |              |
| All (age 19 and up)              | PFR          | Complete >26 | 5955126              | 1093             | 12199893             | 6850             | 67  | 65           | 69           |
| All (age 19 and up)              | PFR          | Booster      | 2289954              | 148              | 12199893             | 6850             | 88  | 86           | 90           |
| All (age 19 and up)              | MOD          | Complete >26 | 5745746              | 872              | 12199893             | 6850             | 73  | 71           | 75           |
| All (age 19 and up)              | MOD          | Booster      | 680944               | 53               | 12199893             | 6850             | 86  | 82           | 89           |
| Female                           | PFR          | Complete >26 | 3581126              | 573              | 9766332              | 4083             | 62  | 58           | 65           |
| Female                           | PFR          | Booster      | 1351212              | 71               | 9766332              | 4083             | 87  | 84           | 90           |
| Female                           | MOD          | Complete >26 | 3377278              | 466              | 9766332              | 4083             | 67  | 64           | 70           |
| Female                           | MOD          | Booster      | 392602               | 23               | 9766332              | 4083             | 86  | 79           | 91           |
| Male                             | PFR          | Complete >26 | 2526910              | 525              | 9578393              | 4280             | 54  | 49           | 58           |
| Male                             | PFR          | Booster      | 943663               | 77               | 9578393              | 4280             | 82  | 77           | 85           |
| Male                             | MOD          | Complete >26 | 2387611              | 407              | 9578393              | 4280             | 62  | 58           | 66           |
| Male                             | MOD          | Booster      | 288447               | 30               | 9578393              | 4280             | 77  | 67           | 84           |
| Age 65 and up                    | PFR          | Complete >26 | 2054120              | 754              | 3038755              | 1933             | 42  | 37           | 47           |
| Age 65 and up                    | PFR          | Booster      | 1403149              | 104              | 3038755              | 1933             | 88  | 86           | 90           |
| Age 65 and up                    | MOD          | Complete >26 | 2194729              | 577              | 3038755              | 1933             | 59  | 55           | 62           |
| Age 65 and up                    | MOD          | Booster      | 403509               | 37               | 3038755              | 1933             | 86  | 80           | 90           |
| Age 45 to 64                     | PFR          | Complete >26 | 1914081              | 208              | 3175481              | 2367             | 85  | 83           | 87           |
| Age 45 to 64                     | PFR          | Booster      | 525594               | 33               | 3175481              | 2367             | 92  | 88           | 94           |
| Age 45 to 64                     | MOD          | Complete >26 | 1840126              | 204              | 3175481              | 2367             | 85  | 83           | 87           |
| Age 45 to 64                     | MOD          | Booster      | 182701               | 13               | 3175481              | 2367             | 90  | 84           | 94           |
| Age 19 to 44                     | PFR          | Complete >26 | 2007128              | 131              | 5926861              | 2417             | 84  | 81           | 87           |
| Age 19 to 44                     | PFR          | Booster      | 358255               | 11               | 5926861              | 2417             | 92  | 86           | 96           |
| Age 19 to 44                     | MOD          | Complete >26 | 1715577              | 91               | 5926861              | 2417             | 87  | 84           | 89           |
| American Indian/Alaska Native MN | PFR          | Complete >26 | 27892                | 20               | 246492               | 395              | 55  | 30           | 71           |
| American Indian/Alaska Native MN | MOD          | Complete >26 | 82577                | 40               | 246492               | 395              | 70  | 58           | 78           |
| Asian/PI MN                      | PFR          | Complete >26 | 289451               | 20               | 673203               | 164              | 72  | 55           | 82           |
| Asian/PI MN                      | MOD          | Complete >26 | 200533               | <11              | 673203               | 164              | 80  | 60           | 90           |
| Black MN                         | PFR          | Complete >26 | 229489               | 24               | 2113897              | 513              | 57  | 35           | 71           |
| Black MN                         | MOD          | Complete >26 | 251666               | 29               | 2113897              | 513              | 53  | 31           | 67           |
| Hispanic MN                      | PFR          | Complete >26 | 167061               | 11               | 1315085              | 443              | 80  | 64           | 89           |
| Hispanic MN                      | MOD          | Complete >26 | 151699               | 17               | 1315085              | 443              | 67  | 46           | 80           |
| White MN                         | PFR          | Complete >26 | 5156692              | 1013             | 13825144             | 6465             | 58  | 55           | 61           |
| White MN                         | PFR          | Booster      | 2081936              | 139              | 13825144             | 6465             | 86  | 83           | 88           |
| White MN                         | MOD          | Complete >26 | 4794767              | 768              | 13825144             | 6465             | 66  | 63           | 68           |
| White MN                         | MOD          | Booster      | 612267               | 49               | 13825144             | 6465             | 83  | 77           | 87           |
| Diabetes                         | PFR          | Complete >26 | 538192               | 306              | 1244587              | 1096             | 35  | 27           | 43           |
| Diabetes                         | PFR          | Booster      | 290177               | 43               | 1244587              | 1096             | 83  | 77           | 88           |
| Diabetes                         | MOD          | Complete >26 | 534738               | 232              | 1244587              | 1096             | 51  | 43           | 57           |
| Diabetes                         | MOD          | Booster      | 83997                | 12               | 1244587              | 1096             | 84  | 71           | 91           |
| Hypertension                     | PFR          | Complete >26 | 1524436              | 595              | 3056716              | 2068             | 42  | 37           | 47           |
| Hypertension                     | PFR          | Booster      | 866678               | 92               | 3056716              | 2068             | 84  | 81           | 87           |
| Hypertension                     | MOD          | Complete >26 | 1459165              | 495              | 3056716              | 2068             | 50  | 45           | 55           |
| Hypertension                     | MOD          | Booster      | 239004               | 35               | 3056716              | 2068             | 78  | 70           | 85           |
| Heart Disease                    | PFR          | Complete >26 | 512684               | 372              | 1501792              | 793              | -37 | -55          | -21          |
| Heart Disease                    | PFR          | Booster      | 332199               | 59               | 1501792              | 793              | 66  | 56           | 74           |
| Heart Disease                    | MOD          | Complete >26 | 528643               | 319              | 1501792              | 793              | -14 | -30          | 0            |
| Heart Disease                    | MOD          | Booster      | 91796                | 20               | 1501792              | 793              | 59  | 36           | 74           |
| Cancer                           | PFR          | Complete >26 | 441634               | 170              | 909411               | 399              | 12  | -5           | 27           |
| Cancer                           | PFR          | Booster      | 328274               | 46               | 909411               | 399              | 68  | 57           | 76           |
| Cancer                           | MOD          | Complete >26 | 388647               | 117              | 909411               | 399              | 31  | 16           | 44           |
| Cancer                           | MOD          | Booster      | 100660               | 24               | 909411               | 399              | 46  | 18           | 64           |
| COPD                             | PFR          | Complete >26 | 372208               | 284              | 1380847              | 1251             | 16  | 4            | 26           |
| COPD                             | PFR          | Booster      | 194307               | 42               | 1380847              | 1251             | 76  | 68           | 82           |
| COPD                             | MOD          | Complete >26 | 374250               | 201              | 1380847              | 1251             | 41  | 31           | 49           |
| COPD                             | MOD          | Booster      | 58989                | 18               | 1380847              | 1251             | 66  | 46           | 79           |

Note: MOD, Moderna; PFR, Pfizer; VE, vaccine effectiveness. Complete >26 indicates individuals more than 26 weeks since a second dose. Booster indicates individuals at least two weeks after a booster dose of Pfizer or Moderna.
